# Supplementary material for: Fusobacterium nucleatum outer membrane vesicles activate autophagy to promote oral cancer metastasis
Source: PubMed Central journal article supplement — J Adv Res. 2023 Apr 13;56:167–79. doi: 10.1016/j.jare.2023.04.002 (PMC10834801; doi:10.1016/j.jare.2023.04.002), 2023-04-13

## Supplementary materials

supplement table 1: Antibodies.

| List of Antibodies |          |              |                  |                             |                |
|--------------------|----------|--------------|------------------|-----------------------------|----------------|
| Antibodies         | Clone    | Applications | Working dilution | Supplier                    | Catalog Number |
| vimentin           | D21H3    | WB           | 1:1 000          | Cell Signaling Technologies | 5741           |
| E-Cadherin         | 24E10    | WB           | 1:1 000          | Cell Signaling Technologies | 3915           |
| N-Cadherin         | D4R1H    | WB           | 1:1 000          | Cell Signaling Technologies | 13116          |
| Claudin-1          | D5H1D    | WB           | 1:1 000          | Cell Signaling Technologies | 13255          |
| LC3B               | EPR18709 | WB           | 1:2000           | abcam                       | ab192890       |
| P62                | EPR4844  | WB           | 1:1 000          | abcam                       | ab109012       |
| $\beta$ -actin     | 13E5     | WB           | 1:1 000          | Cell Signaling Technologies | 4970           |

supplement table 2: Sequences of qPCR primers.

| Primer's Name | Forward (5'-3')                 | Reverse (5'-3')                |
|---------------|---------------------------------|--------------------------------|
| Beclin-1      | 5' ACATCTGGCACAGTGGACAGTTTG 3'  | 5' AGCATGGAGCAGCAACACAGTC 3'   |
| ATG3          | 5'-AAGGCATACCTACCAACAGGCAAAC 3' | 5'-CCATCCGCCATCACCATCATCTTC 3' |
| ATG7          | 5' CCGCAGAGATGTGGAGCAACTG 3'    | 5' TCCCAAAGCAGCATTGATGACCAG 3' |
| GAPDH         | 5' AAAGGTGGAGGAGTGGGT 3'        | 5' GGGAAACTGTGGCGTGAT 3'       |

Supplementary Figure 6

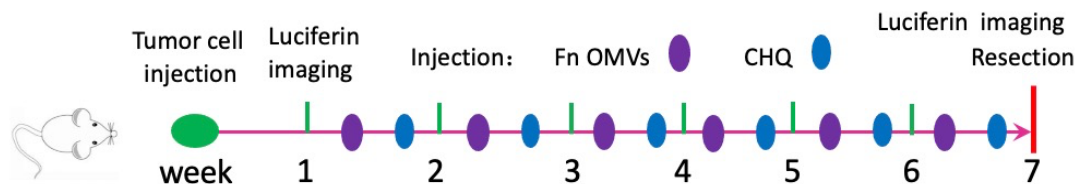

Supplement: mmc1.pdf [file mmc1.pdf]
